# Supplementary material
Source: ML conference proceedings conference paper supplement (https://openaccess.thecvf.com/content/CVPR2024/html/Shen_Rethinking_the_Spatial_CVPR_2024_paper.html)
Supplement: Supplementary file 1 [file Shen_Rethinking_the_Spatial_CVPR_2024_supplemental.pdf]

# Rethinking the Spatial Inconsistency in Classifier-Free Diffusion Guidance

## Supplementary Material

### 1. Deriving Equation 11

In this section, we provide a derivation for Equation 11 based on one assumption that may be not particularly strict, i.e., *for any denoising step  $t$ , the semantic units, corresponding to token set  $\{w_1, \dots, w_L\}$ , with masks  $\{m_{t,1}, \dots, m_{t,L}\}$  are independent of each other.* Along this line, we can derive:

$$\begin{aligned} p(w_i|x_t) &= p(w_i | \sum_{j=1}^L m_{t,j} \odot x_t) \\ &= \frac{\prod_{j=1}^L p(m_{t,j} \odot x_t | w_i) p(w_i)}{\prod_{j=1}^L p(m_{t,j} \odot x_t)} \\ &= \frac{p(m_{t,i} \odot x_t | w_i) p(w_i) \prod_{j=1, j \neq i}^L p(m_{t,j} \odot x_t)}{\prod_{j=1}^L p(m_{t,j} \odot x_t)} \\ &= \frac{p(m_{t,i} \odot x_t | w_i) p(w_i)}{p(m_{t,i} \odot x_t)} \\ &= p(w_i | m_{t,i} \odot x_t). \end{aligned}$$

Then, we can deduce Equation 11 as follows:

$$\begin{aligned} p(c|x_t) &= \prod_{i=1}^L p(w_i|x_t) \\ &= \prod_{i=1}^L p(w_i | m_{t,i} \odot x_t). \\ \nabla_{x_t} \log p(w_i | m_{t,i} \odot x_t) &= \nabla_{m_{t,i} \odot x_t} \log p(w_i | m_{t,i} \odot x_t) \\ &= \nabla_{m_{t,i} \odot x_t} \log p(w_i | x_t) \\ &= \nabla_{m_{t,i} \odot x_t} \log p(c|x_t) \\ &= m_{t,i} \odot \nabla_{x_t} \log p(c|x_t). \end{aligned}$$

Note that the prior assumption may not be strict in practice. However, it is intuitive that the patches among different semantic regions are more independent than those in the same patches. Meanwhile, based on the segmentation examples in Figure 3 and our experimental results, we believe that it is beneficial to segment the latent image and customize guidance degrees for different semantic regions.

### 2. More Experimental Details

**Benchmark Models.** In our experiment, we involve three special diffusion models as the benchmarks, which are all publicly accessible:

- Stable Diffusion v1.5 (**SD-v1.5**), a diffusion model in the latent space of powerful pre-trained autoencoders <sup>1</sup>,

<sup>1</sup><https://huggingface.co/runwayml/stable-diffusion-v1-5>

which use the CLIP [2] as the text encoder and output images with the resolution 512x512.

- Stable Diffusion v2.1 (**SD-v2.1**), a variant of SD-v1.5 with more model size <sup>2</sup>, which can output images with the resolution 768x768.
- DeepFloyd IF (**IF**), is a diffusion model in the pixel image space <sup>3</sup>, which is constructed using multiple diffusion models with T5XXL as the text encoder. In particular, we use the first two stages of the middle-scale version, i.e., IF-I-M-v1.0 and IF-II-M-v1.0, which produce the 64x64 resolution image and boost them into 256x 256 resolution, respectively.

**Quantitative Metric.** Two qualitative metrics based on the MSCOCO validation dataset are used:

- **FID-30K**, where the FID score is computed on the 30K generated images with prompts selected from the validation set and the corresponding original images.
- **CLIP Score**, where 5K captions are selected randomly for guiding image synthesis, and CLIP-VIT-G-14 <sup>4</sup> is used to compute the similarity between the generated image and the corresponding caption.

In particular, our metric settings may be different from those in the official reports of the SD and IF models. It is somewhat weird that SD-v2.1 fails to outperform SD-v1.5 in our settings. Here, we also add another comparison on them based on a similar setting to their official report <sup>5</sup>, i.e., where FID-10k and CLIP Score (CLIP-VIT-G-14) on MSCOCO dataset are used with the 50-step DDIM sampler. The results are shown in Figure 1. We can find that our S-CFG strategy also outperforms the original CFG strategy.

### 3. Analysis on the Efficiency

Here, we provide an additional analysis of the time cost of our S-CFG strategy. Specifically, we use **DPMSolver++** with 50 steps as the sampler to generate images with different base models. All programs run on a single A100 GPU. Table 1 shows the average time cost for generating a sample in 10 runs. We can find only a tiny time cost has been required compared with the original CFG strategy.

### 4. More Ablation Analysis

Here, we provide an additional ablation analysis of the S-CFG on the diffusion model with multiple stages, such as DeepFloyd IF [3]. We try to respond to the question: *should*

<sup>2</sup><https://huggingface.co/stabilityai/stable-diffusion-2-1>

<sup>3</sup><https://huggingface.co/DeepFloyd/IF-I-M-v1.0>

<sup>4</sup><https://huggingface.co/laion/CLIP-ViT-g-14-laion2B-s34B-b88K>

<sup>5</sup><https://huggingface.co/stabilityai/stable-diffusion-2>

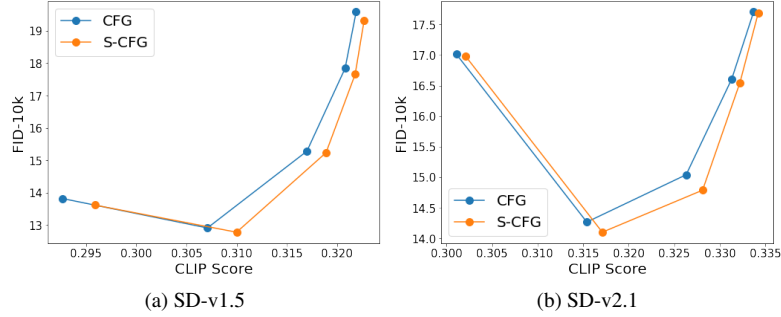

Figure 1. The trade-off curve of FID-10K VS CLIP Score with DDIM sampler.

Table 1. The analysis on the time cost.

|         | CFG   | S-CFG | improv. |
|---------|-------|-------|---------|
| SD-v1.5 | 2.773 | 2.848 | 2.70%   |
| SD-v2.1 | 7.054 | 7.167 | 1.60%   |
| IF      | 8.595 | 8.847 | 2.93%   |

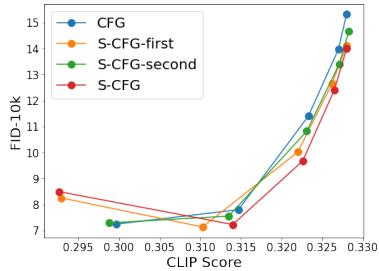

Figure 2. The ablation analysis of the S-CFG on the diffusion model with multiple stages.

the S-CFG strategy be used on all diffusion stages? Specifically, based on the IF model used in our paper, we compare the performance of three methods:

- **S-CFG-first**, where the S-CFG strategy is only used in the first diffusion model, i.e., IF-I-M-v1.0.
- **S-CFG-second**, where the S-CFG strategy is only used in the second diffusion model, i.e., IF-II-M-v1.0.
- **S-CFG**, where the S-CFG strategy is used in both two diffusion models.

In addition, the original CFG strategy is involved as a baseline. We use **DPMSolver++** as the sampler with 50 steps and vary the parameter  $\gamma$  in [2.0, 3.0, 5.0, 7.5, 10.0]. The trade-off curve of FID-30k VS CLIP Score is shown in Figure 2. We can find that S-CFG tends to achieve the best trade-off between FID-30K and CLIP Score, while S-CFG-first and S-CFG-second perform similarly.

## 5. More Evaluation on Effectiveness

Recently, a new metric called T2I-CompBench [1] was introduced to evaluate diffusion models, which assesses image quality from 6 aspects and aligns with human preference better. Here, we provide another comparison based on

Table 2. Evaluation on T2I-CompBench, where the  $\gamma = 7.5$ .

| Model         | Attribute Binding |               |               | Object Relationship |               | Complex       |
|---------------|-------------------|---------------|---------------|---------------------|---------------|---------------|
|               | Shape             | Color         | Texture       | Non-Spatial         | Spatial       |               |
| SD-v1.5+CFG   | 0.3664            | 0.3761        | 0.4286        | 0.3109              | 0.111         | 0.2969        |
| SD-v1.5+S-CFG | <b>0.3793</b>     | <b>0.3879</b> | <b>0.4288</b> | <b>0.3111</b>       | <b>0.1182</b> | <b>0.2993</b> |
| SD-v2.1+CFG   | 0.4518            | 0.549         | 0.5146        | 0.3096              | 0.1512        | 0.3154        |
| SD-v2.1+S-CFG | <b>0.4558</b>     | <b>0.5649</b> | <b>0.5333</b> | <b>0.3104</b>       | <b>0.1567</b> | <b>0.3168</b> |

this metric. The results in Table 2 show that SD-v2.1 outperforms SD-v1.5 significantly, and S-CFG performs better than CFG.

## 6. Detailed Table of Experiments

Here, we show the detailed tables for experiments in Figures 4 and 6. We can find that our S-CFG achieves the best performance on all settings, with the best FID-30K score and CLIP Score.

## 7. Additional Qualitative Samples

In this section, we present supplementary samples in Figure 3 generated by different base models with CFG and S-CFG. These additional samples further exhibit the superiority of S-CFG compared with the original CFG strategy.

## References

- [1] Kaiyi Huang, Kaiyue Sun, Enze Xie, Zhenguo Li, and Xihui Liu. T2i-compbench: A comprehensive benchmark for open-world compositional text-to-image generation. *Advances in Neural Information Processing Systems*, 36, 2023. 2
- [2] Alec Radford, Jong Wook Kim, Chris Hallacy, Aditya Ramesh, Gabriel Goh, Sandhini Agarwal, Girish Sastry, Amanda Askell, Pamela Mishkin, Jack Clark, et al. Learning transferable visual models from natural language supervision. In *International conference on machine learning*, pages 8748–8763. PMLR, 2021. 1
- [3] Alex Shonenkov, Misha Konstantinov, Daria Bakshandaeva, Christoph Schuhmann, Ksenia Ivanova, and Nadiia Klokova. Deepfloyd if, 2023. <https://www.deepfloyd.ai/deepfloyd-if>. 1

Table 3. **The trade-off curve of SD-v1.5**, where the best FID-30k and CLIP Score are highlighted.

| $\gamma$ | DDIM         |               |              |               | DPMSolver++  |               |              |               |
|----------|--------------|---------------|--------------|---------------|--------------|---------------|--------------|---------------|
|          | CFG          |               | S-CFG        |               | CFG          |               | S-CFG        |               |
|          | FID-30K      | CLIP Score    |
| 2.0      | 8.696        | 0.2948        | 8.656        | 0.2972        | 8.991        | 0.2954        | 9.023        | 0.2964        |
| 3.0      | <b>7.904</b> | 0.3097        | <b>7.802</b> | 0.3107        | <b>7.760</b> | 0.3091        | <b>7.717</b> | 0.3099        |
| 5.0      | 10.366       | 0.3184        | 10.069       | 0.3196        | 10.026       | 0.3182        | 9.757        | 0.3187        |
| 7.5      | 13.008       | 0.3217        | 12.620       | 0.3228        | 12.466       | 0.3223        | 12.059       | 0.3226        |
| 10.0     | 14.682       | <b>0.3230</b> | 14.101       | <b>0.3231</b> | 14.107       | <b>0.3235</b> | 13.694       | <b>0.3236</b> |

Table 4. **The trade-off curve of SD-v2.1**, where the best FID-30k and CLIP Score are highlighted.

| $\gamma$ | DDIM          |               |               |               | DPMSolver++   |               |               |               |
|----------|---------------|---------------|---------------|---------------|---------------|---------------|---------------|---------------|
|          | CFG           |               | S-CFG         |               | CFG           |               | S-CFG         |               |
|          | FID-30K       | CLIP Score    |
| 2.0      | 14.394        | 0.3053        | 13.892        | 0.3068        | 14.999        | 0.3040        | 14.864        | 0.3060        |
| 3.0      | 10.509        | 0.3191        | 10.227        | 0.3204        | 10.869        | 0.3187        | 10.797        | 0.3200        |
| 5.0      | <b>10.429</b> | 0.3286        | <b>10.137</b> | 0.3306        | <b>10.241</b> | 0.3291        | <b>10.016</b> | 0.3304        |
| 7.5      | 11.548        | 0.3331        | 11.278        | 0.3342        | 11.324        | 0.3339        | 10.944        | 0.3342        |
| 10.0     | 12.604        | <b>0.3357</b> | 12.371        | <b>0.3359</b> | 12.166        | <b>0.3356</b> | 11.833        | <b>0.3359</b> |

Table 5. **The trade-off curve of IF**, where the best FID-30k and CLIP Score are highlighted.

| $\gamma$ | DDIM         |               |              |               | DPMSolver++  |               |              |               |
|----------|--------------|---------------|--------------|---------------|--------------|---------------|--------------|---------------|
|          | CFG          |               | S-CFG        |               | CFG          |               | S-CFG        |               |
|          | FID-30K      | CLIP Score    |
| 2.0      | <b>9.820</b> | 0.3076        | <b>9.309</b> | 0.299         | <b>7.242</b> | 0.2997        | 8.494        | 0.2926        |
| 3.0      | 13.804       | 0.3195        | 10.864       | 0.3152        | 7.799        | 0.3147        | <b>7.227</b> | 0.314         |
| 5.0      | 17.267       | 0.3257        | 14.473       | 0.3259        | 11.396       | 0.3233        | 9.67         | 0.3226        |
| 7.5      | 18.532       | 0.329         | 16.621       | 0.3288        | 13.968       | 0.327         | 12.402       | 0.3265        |
| 10.0     | 19.029       | <b>0.3296</b> | 17.634       | <b>0.3299</b> | 15.31        | <b>0.3280</b> | 13.99        | <b>0.3280</b> |

Table 6. **The trade-off curve in the ablation analysis**, where the best FID-30k and CLIP Score are highlighted. The experiment is based on SD-v1.5 with 50-step DPMSolver++ Sampler.

| $\gamma$ | S-CFG-mean   |               | S-CFG w/o sa |               | S-CFG-sa     |               | S-CFG        |               |
|----------|--------------|---------------|--------------|---------------|--------------|---------------|--------------|---------------|
|          | FID-30K      | CLIP Score    |
| 2.0      | 10.703       | 0.2869        | 9.110        | 0.2963        | 9.063        | 0.2966        | 9.023        | 0.2964        |
| 3.0      | <b>7.695</b> | 0.3044        | <b>7.811</b> | 0.3089        | <b>7.736</b> | 0.3099        | <b>7.717</b> | 0.3099        |
| 5.0      | 8.813        | 0.3162        | 9.822        | 0.3185        | 9.755        | 0.3185        | 9.757        | 0.3187        |
| 7.5      | 11.204       | 0.3213        | 12.102       | 0.3222        | 12.083       | 0.3227        | 12.059       | 0.3226        |
| 10.0     | 12.838       | <b>0.3233</b> | 13.722       | <b>0.3235</b> | 13.690       | <b>0.3235</b> | 13.694       | <b>0.3236</b> |

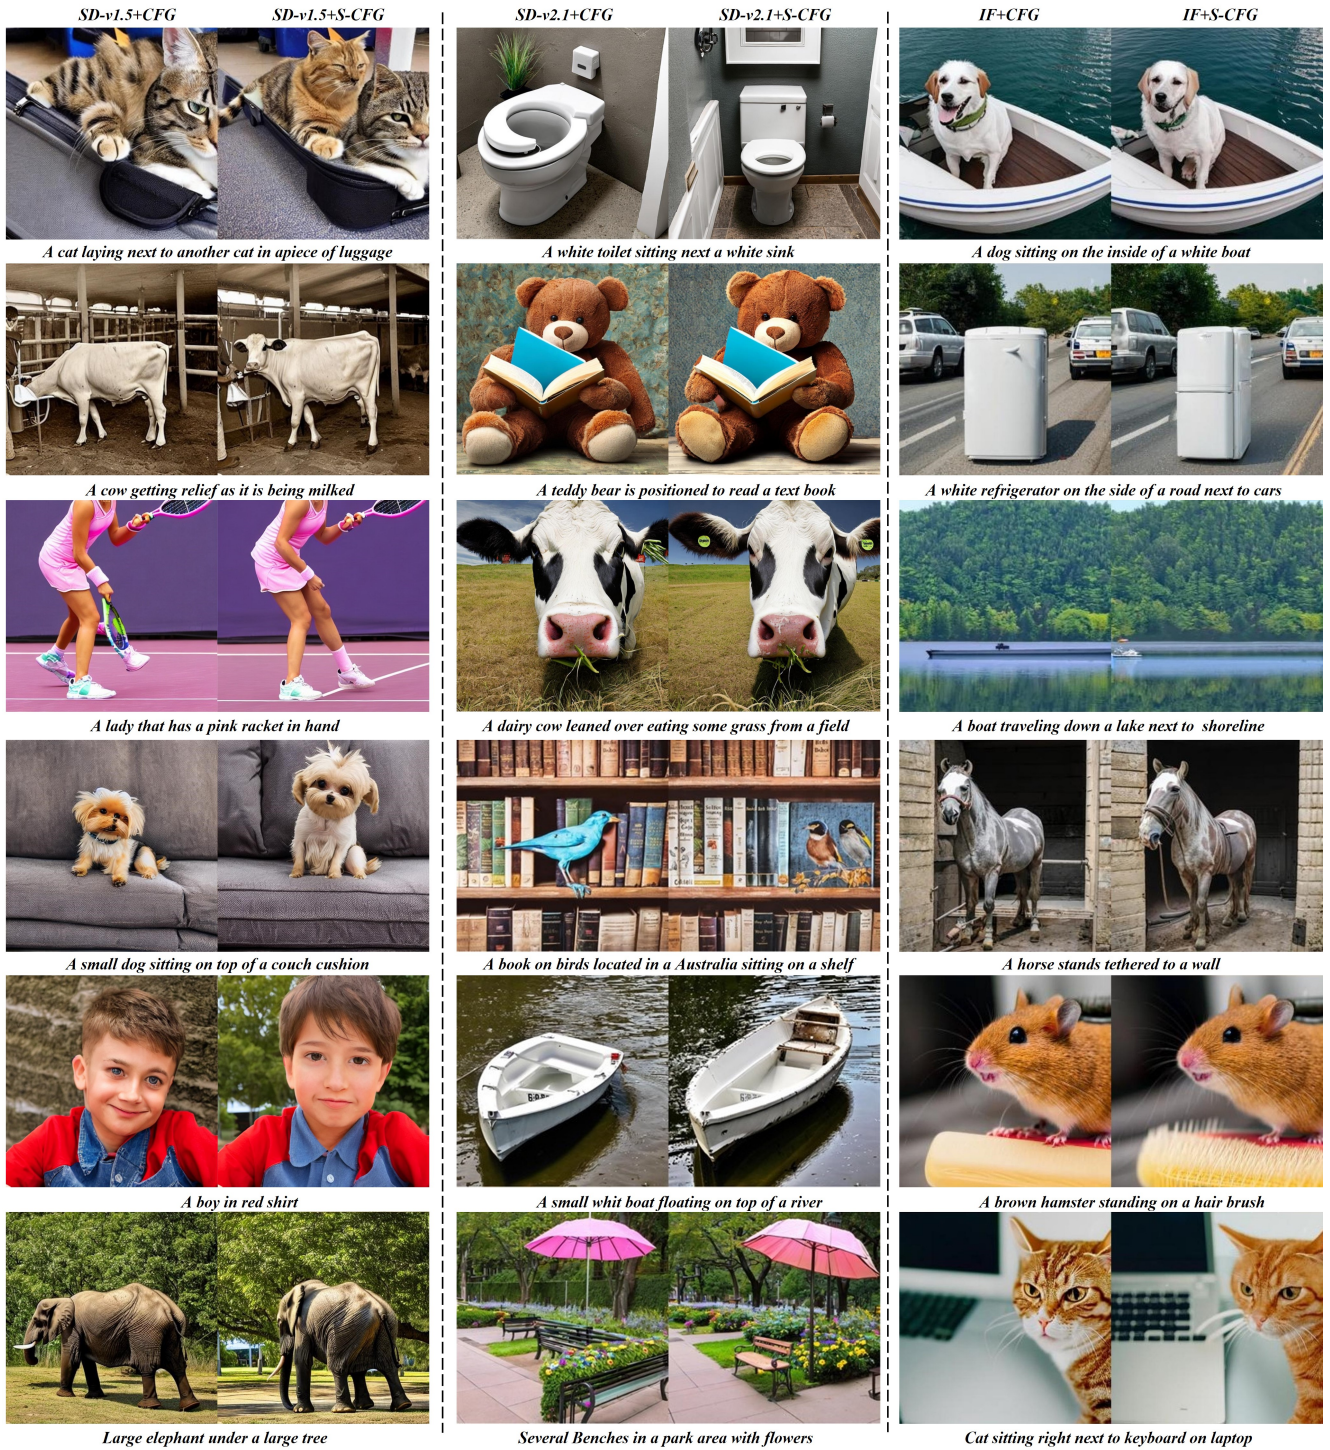

Figure 3. More samples generated by different base models with CFG (left) or S-CFG (right).
